# Supplementary material for: Therapeutic effects of antidepressants for global improvement and subdomain symptoms of autism spectrum disorder: a systematic review and meta-analysis
Source: PubMed Central journal article supplement — J Psychiatry Neurosci. 2022 Aug 10;47(4):E299–310. doi: 10.1503/jpn.210191 (PMC9377548; doi:10.1503/jpn.210191), 2022-08-10
Supplement: 210191-at-1.pdf [file 210191-at-1.pdf]

**Appendix 1** to Liang S, Sun C, Fan H. Therapeutic effects of antidepressants for global improvement and subdomain symptoms of autism spectrum disorders: a systematic review and meta-analysis. *J Psychiatry Neurosci* 2022. doi: 10.1503/jpn.210191. Copyright © 2022 The Author(s) or their employer(s). To receive this resource in an accessible format, please contact us at [cmajgroup@cmaj.ca](mailto:cmajgroup@cmaj.ca). Online appendices are unedited and posted as supplied by the authors.

**eTable 1. Applied keywords and the search results from each database**

| Database           | Keywords                                                                                                                                                                                                                                                                                                                                                                                                                                                                                                                                                                                                    | Filter           | Date<br>(yyyy/mm/dd) | Result |
|--------------------|-------------------------------------------------------------------------------------------------------------------------------------------------------------------------------------------------------------------------------------------------------------------------------------------------------------------------------------------------------------------------------------------------------------------------------------------------------------------------------------------------------------------------------------------------------------------------------------------------------------|------------------|----------------------|--------|
| PubMed             | ("Autistic Disorder"[Mesh] OR "Autism Spectrum Disorder"[Mesh]) AND ("Antidepressive Agents"[Mesh] OR "Antidepressive Agents" [Pharmacological Action] OR "Antidepressive Agents, Second-Generation"[Mesh] OR "Antidepressive Agents, Tricyclic"[Mesh] OR "Antidepressive Agents, Second-Generation" [Pharmacological Action] OR "Antidepressive Agents, Tricyclic" [Pharmacological Action] OR "Adrenergic Uptake Inhibitors"[Mesh] OR "Fluvoxamine"[Mesh] OR "Bupropion"[Mesh] OR "Citalopram"[Mesh] OR "Monoamine Oxidase Inhibitors"[Mesh] OR "Serotonin and Noradrenaline Reuptake Inhibitors"[Mesh] ) | RCT              | 2022/02/28           | 40     |
| Embase             | (antidepressant agent'/exp OR 'antidepressant agent) AND (autism'/exp OR 'autism)                                                                                                                                                                                                                                                                                                                                                                                                                                                                                                                           | RCT              | 2022/02/28           | 192    |
| ClinicalKey        | (Antidepressants) AND (autism)                                                                                                                                                                                                                                                                                                                                                                                                                                                                                                                                                                              | RCT              | 2022/02/28           | 36     |
| Cochrane CENTRAL   | (antidepressants or SSRI or SNRI or TCA or MAOI or NASSA or Bupropion) AND (autism or ASD or autism spectrum disorder or pervasive developmental disorder or Asperger syndrome)                                                                                                                                                                                                                                                                                                                                                                                                                             | Trials           | 2022/02/28           | 47     |
| ScienceDirect      | (Antidepressants) AND (autism)<br>Areas: Pharmacology, Toxicology and Pharmaceutical Science                                                                                                                                                                                                                                                                                                                                                                                                                                                                                                                | Research article | 2022/02/28           | 243    |
| Web of Science     | (antidepressants or SSRI or SNRI or TCA or MAOI or NASSA or Bupropion) AND (autism or ASD or autism spectrum disorder or pervasive developmental disorder or Asperger syndrome)                                                                                                                                                                                                                                                                                                                                                                                                                             | Article          | 2022/02/28           | 372    |
| ClinicalTrials.gov | (Autism) AND (antidepressants)                                                                                                                                                                                                                                                                                                                                                                                                                                                                                                                                                                              | NA               | 2022/02/28           | 39     |

**Appendix 1** to Liang S, Sun C, Fan H. Therapeutic effects of antidepressants for global improvement and subdomain symptoms of autism spectrum disorders: a systematic review and meta-analysis. *J Psychiatry Neurosci* 2022. doi: 10.1503/jpn.210191. Copyright © 2022 The Author(s) or their employer(s). To receive this resource in an accessible format, please contact us at [cmajgroup@cmaj.ca](mailto:cmajgroup@cmaj.ca). Online appendices are unedited and posted as supplied by the authors.

Abbreviations: NA, not applied; RCT, randomized controlled trials

**Appendix 1** to Liang S-C, Sun C-K, Fan H-Y. Therapeutic effects of antidepressants for global improvement and subdomain symptoms of autism spectrum disorders: a systematic review and meta-analysis. *J Psychiatry Neurosci* 2022. doi: 10.1503/jpn.210191. Copyright © 2022 The Author(s) or their employer(s). To receive this resource in an accessible format, please contact us at [cmajgroup@cmaj.ca](mailto:cmajgroup@cmaj.ca). Online appendices are unedited and posted as supplied by the authors.

**eTable 2. Reasons for study exclusion**

| Reason                             | Number of trials | References |
|------------------------------------|------------------|------------|
| No antidepressant treatment        | 17               | 1-17       |
| Not RCT                            | 7                | 18-24      |
| Lack of adequate data for analysis | 5                | 25-29      |
| Included diagnoses other than ASD  | 8                | 30-37      |
| Duplicated sample source           | 3                | 38-40      |

**REFERENCES**

1. DeVane CL, Charles JM, Abramson RK, et al. Pharmacotherapy of Autism Spectrum Disorder: Results from the Randomized BAART Clinical Trial. *Pharmacotherapy*. Jun 2019;39(6):626-635.
2. Owen R, Sikich L, Marcus RN, et al. Aripiprazole in the treatment of irritability in children and adolescents with autistic disorder. *Pediatrics*. Dec 2009;124(6):1533-1540.
3. Ghanizadeh A, Sahraeizadeh A, Berk M. A head-to-head comparison of aripiprazole and risperidone for safety and treating autistic disorders, a randomized double blind clinical trial. *Child psychiatry and human development*. 2014;45(2):185-192.
4. Lamberti M, Siracusano R, Italiano D, et al. Head-to-Head Comparison of Aripiprazole and Risperidone in the Treatment of ADHD Symptoms in Children with Autistic Spectrum Disorder and ADHD: A Pilot, Open-Label, Randomized Controlled Study. *Paediatric drugs*. Aug 2016;18(4):319-329.
5. Berk M, Woods RL, Nelson MR, et al. Effect of Aspirin vs Placebo on the Prevention of Depression in Older People: A Randomized Clinical Trial. *JAMA psychiatry*. Oct 1 2020;77(10):1012-1020.
6. Berk M, Daglas R, Dandash O, et al. Quetiapine v. lithium in the maintenance phase following a first episode of mania: randomised

**Appendix 1** to Liang S-C, Sun C-K, Fan H-Y. Therapeutic effects of antidepressants for global improvement and subdomain symptoms of autism spectrum disorders: a systematic review and meta-analysis. *J Psychiatry Neurosci* 2022. doi: 10.1503/jpn.210191. Copyright © 2022 The Author(s) or their employer(s). To receive this resource in an accessible format, please contact us at [cmajgroup@cmaj.ca](mailto:cmajgroup@cmaj.ca). Online appendices are unedited and posted as supplied by the authors.

controlled trial. *The British journal of psychiatry : the journal of mental science*. Jun 2017;210(6):413-421.

7. Ichikawa H, Mikami K, Okada T, et al. Aripiprazole in the Treatment of Irritability in Children and Adolescents with Autism Spectrum Disorder in Japan: A Randomized, Double-blind, Placebo-controlled Study. *Child psychiatry and human development*. Oct 2017;48(5):796-806.
8. Hollander E, Wasserman S, Swanson EN, et al. A double-blind placebo-controlled pilot study of olanzapine in childhood/adolescent pervasive developmental disorder. *Journal of child and adolescent psychopharmacology*. Oct 2006;16(5):541-548.
9. Arnold LE, Aman MG, Li X, et al. Research Units of Pediatric Psychopharmacology (RUPP) autism network randomized clinical trial of parent training and medication: one-year follow-up. *Journal of the American Academy of Child and Adolescent Psychiatry*. Nov 2012;51(11):1173-1184.
10. Marcus RN, Owen R, Kamen L, et al. A placebo-controlled, fixed-dose study of aripiprazole in children and adolescents with irritability associated with autistic disorder. *Journal of the American Academy of Child and Adolescent Psychiatry*. Nov 2009;48(11):1110-1119.
11. Malone RP, Cater J, Sheikh RM, Choudhury MS, Delaney MA. Olanzapine versus haloperidol in children with autistic disorder: an open pilot study. *Journal of the American Academy of Child and Adolescent Psychiatry*. Aug 2001;40(8):887-894.
12. Findling RL, Mankoski R, Timko K, et al. A randomized controlled trial investigating the safety and efficacy of aripiprazole in the long-term maintenance treatment of pediatric patients with irritability associated with autistic disorder. *The Journal of clinical psychiatry*. Jan 2014;75(1):22-30.
13. McDougle CJ, Naylor ST, Cohen DJ, Aghajanian GK, Heninger GR, Price LH. Effects of tryptophan depletion in drug-free adults with autistic disorder. *Archives of general psychiatry*. Nov 1996;53(11):993-1000.

**Appendix 1** to Liang S-C, Sun C-K, Fan H-Y. Therapeutic effects of antidepressants for global improvement and subdomain symptoms of autism spectrum disorders: a systematic review and meta-analysis. *J Psychiatry Neurosci* 2022. doi: 10.1503/jpn.210191. Copyright © 2022 The Author(s) or their employer(s). To receive this resource in an accessible format, please contact us at [cmajgroup@cmaj.ca](mailto:cmajgroup@cmaj.ca). Online appendices are unedited and posted as supplied by the authors.

14. Mankoski R, Stockton G, Manos G, et al. Aripiprazole treatment of irritability associated with autistic disorder and the relationship between prior antipsychotic exposure, adverse events, and weight change. *Journal of child and adolescent psychopharmacology*. Oct 2013;23(8):572-576.
15. Stern LM, Walker MK, Sawyer MG, Oades RD, Badcock NR, Spence JG. A controlled crossover trial of fenfluramine in autism. *Journal of child psychology and psychiatry, and allied disciplines*. May 1990;31(4):569-585.
16. Kohler JA, Shortland G, Rolles CJ. Effect of fenfluramine on autistic symptoms. *British medical journal (Clinical research ed.)*. Oct 10 1987;295(6603):885.
17. Aman MG, Kasper W, Manos G, et al. Line-item analysis of the Aberrant Behavior Checklist: results from two studies of aripiprazole in the treatment of irritability associated with autistic disorder. *Journal of child and adolescent psychopharmacology*. Oct 2010;20(5):415-422.
18. Carrasco M, Volkmar FR, Bloch MH. Pharmacologic treatment of repetitive behaviors in autism spectrum disorders: evidence of publication bias. *Pediatrics*. May 2012;129(5):e1301-1310.
19. Zhou MS, Nasir M, Farhat LC, Kook M, Artukoglu BB, Bloch MH. Meta-analysis: Pharmacologic Treatment of Restricted and Repetitive Behaviors in Autism Spectrum Disorders. *Journal of the American Academy of Child and Adolescent Psychiatry*. Jan 2021;60(1):35-45.
20. Fung LK, Mahajan R, Nozzolillo A, et al. Pharmacologic Treatment of Severe Irritability and Problem Behaviors in Autism: A Systematic Review and Meta-analysis. *Pediatrics*. Feb 2016;137 Suppl 2:S124-135.
21. Yu Y, Chaulagain A, Pedersen SA, et al. Pharmacotherapy of restricted/repetitive behavior in autism spectrum disorder: a systematic review and meta-analysis. *BMC psychiatry*. Mar 12 2020;20(1):121.
22. McPheeters ML, Warren Z, Sathe N, et al. A systematic review of medical treatments for children with autism spectrum disorders. *Pediatrics*. May 2011;127(5):e1312-1321.

**Appendix 1** to Liang S-C, Sun C-K, Fan H-Y. Therapeutic effects of antidepressants for global improvement and subdomain symptoms of autism spectrum disorders: a systematic review and meta-analysis. *J Psychiatry Neurosci* 2022. doi: 10.1503/jpn.210191. Copyright © 2022 The Author(s) or their employer(s). To receive this resource in an accessible format, please contact us at [cmajgroup@cmaj.ca](mailto:cmajgroup@cmaj.ca). Online appendices are unedited and posted as supplied by the authors.

23. Kim S, Boylan K. Effectiveness of Antidepressant Medications for Symptoms of Irritability and Disruptive Behaviors in Children and Adolescents. *Journal of child and adolescent psychopharmacology*. Oct 2016;26(8):694-704.
24. Mathai J, Bourne A, Cranswick N. Lessons learnt in conducting a clinical drug trial in children with Asperger Syndrome. *Australasian psychiatry : bulletin of Royal Australian and New Zealand College of Psychiatrists*. Jun 2005;13(2):173-175.
25. Wichers RH, Findon JL, Jelsma A, et al. Modulation of brain activation during executive functioning in autism with citalopram. *Translational psychiatry*. Nov 11 2019;9(1):286.
26. Buchsbaum MS, Hollander E, Haznedar MM, et al. Effect of fluoxetine on regional cerebral metabolism in autistic spectrum disorders: a pilot study. *The international journal of neuropsychopharmacology*. Jun 2001;4(2):119-125.
27. Anagnostou E, Esposito K, Soorya L, Chaplin W, Wasserman S, Hollander E. Divalproex versus placebo for the prevention of irritability associated with fluoxetine treatment in autism spectrum disorder. *Journal of clinical psychopharmacology*. Aug 2006;26(4):444-446.
28. Croonenberghs J, Spaas K, Wauters A, et al. Faulty serotonin--DHEA interactions in autism: results of the 5-hydroxytryptophan challenge test. *Neuro endocrinology letters*. Jun 2008;29(3):385-390.
29. Oades RD, Stern LM, Walker MK, Clark CR, Kapoor V. Event-related potentials and monoamines in autistic children on a clinical trial of fenfluramine. *International journal of psychophysiology : official journal of the International Organization of Psychophysiology*. Apr 1990;8(3):197-212.
30. Kavanagh BE, Williams LJ, Berk M, et al. Personality disorder and functioning in major depressive disorder: a nested study within a randomized controlled trial. *Revista brasileira de psiquiatria (Sao Paulo, Brazil : 1999)*. Jan-Feb 2020;42(1):14-21.

**Appendix 1** to Liang S-C, Sun C-K, Fan H-Y. Therapeutic effects of antidepressants for global improvement and subdomain symptoms of autism spectrum disorders: a systematic review and meta-analysis. *J Psychiatry Neurosci* 2022. doi: 10.1503/jpn.210191. Copyright © 2022 The Author(s) or their employer(s). To receive this resource in an accessible format, please contact us at [cmajgroup@cmaj.ca](mailto:cmajgroup@cmaj.ca). Online appendices are unedited and posted as supplied by the authors.

31. Chantiluke K, Barrett N, Giampietro V, Brammer M, Simmons A, Rubia K. Disorder-dissociated effects of fluoxetine on brain function of working memory in attention deficit hyperactivity disorder and autism spectrum disorder. *Psychological medicine*. Apr 2015;45(6):1195-1205.
32. AlOlaby RR, Sweha SR, Silva M, et al. Molecular biomarkers predictive of sertraline treatment response in young children with fragile X syndrome. *Brain & development*. Jun 2017;39(6):483-492.
33. Chantiluke K, Barrett N, Giampietro V, et al. Inverse fluoxetine effects on inhibitory brain activation in non-comorbid boys with ADHD and with ASD. *Psychopharmacology*. Jun 2015;232(12):2071-2082.
34. Robert R, Blakeney PE, Villarreal C, Rosenberg L, Meyer WJ, 3rd. Imipramine treatment in pediatric burn patients with symptoms of acute stress disorder: a pilot study. *Journal of the American Academy of Child and Adolescent Psychiatry*. Jul 1999;38(7):873-882.
35. Robert R, Tcheung WJ, Rosenberg L, et al. Treating thermally injured children suffering symptoms of acute stress with imipramine and fluoxetine: a randomized, double-blind study. *Burns : journal of the International Society for Burn Injuries*. Nov 2008;34(7):919-928.
36. Greiss Hess L, Fitzpatrick SE, Nguyen DV, et al. A Randomized, Double-Blind, Placebo-Controlled Trial of Low-Dose Sertraline in Young Children With Fragile X Syndrome. *Journal of developmental and behavioral pediatrics : JDBP*. Oct 2016;37(8):619-628.
37. Humble M, Bejerot S, Bergqvist PB, Bengtsson F. Reactivity of serotonin in whole blood: relationship with drug response in obsessive-compulsive disorder. *Biological psychiatry*. Feb 15 2001;49(4):360-368.
38. King BH, Dukes K, Donnelly CL, et al. Baseline factors predicting placebo response to treatment in children and adolescents with autism spectrum disorders: a multisite randomized clinical trial. *JAMA pediatrics*. Nov 2013;167(11):1045-1052.
39. Scahill L, McCracken JT, Bearss K, et al. Design and subject characteristics in the federally-funded citalopram trial in children with pervasive

**Appendix 1** to Liang S-C, Sun C-K, Fan H-Y. Therapeutic effects of antidepressants for global improvement and subdomain symptoms of autism spectrum disorders: a systematic review and meta-analysis. *J Psychiatry Neurosci* 2022. doi: 10.1503/jpn.210191. Copyright © 2022 The Author(s) or their employer(s). To receive this resource in an accessible format, please contact us at [cmajgroup@cmaj.ca](mailto:cmajgroup@cmaj.ca). Online appendices are unedited and posted as supplied by the authors.

developmental disorders. *Journal of autism and developmental disorders*. Mar 2012;42(3):432-440.

- 40.** Mouti A, Reddihough D, Marraffa C, et al. Fluoxetine for Autistic Behaviors (FAB trial): study protocol for a randomized controlled trial in children and adolescents with autism. *Trials*. Jun 16 2014;15:230.



**Appendix 1** to Liang S-C, Sun C-K, Fan H-Y. Therapeutic effects of antidepressants for global improvement and subdomain symptoms of autism spectrum disorders: a systematic review and meta-analysis. *J Psychiatry Neurosci* 2022. doi: 10.1503/jpn.210191. Copyright © 2022 The Author(s) or their employer(s). To receive this resource in an accessible format, please contact us at [cmajgroup@cmaj.ca](mailto:cmajgroup@cmaj.ca). Online appendices are unedited and posted as supplied by the authors.

**eTable 3. Regression coefficients of improvement in restricted and repetitive behaviors (RRBs), and global symptoms in included studies using the mixed-effects model**

| Variables           | Coefficient (95% CI)         |      |                              |      |
|---------------------|------------------------------|------|------------------------------|------|
|                     | RRBs (Number of trials)      | $p$  | Global                       | $p$  |
| Percentage of women | 0.01 (-0.01 to 0.04) (n=12)  | 0.30 | -0.04 (-0.13 to 0.06) (n=10) | 0.44 |
| Age                 | 0.02 (-0.004 to 0.04) (n=11) | 0.11 | 0.08 (0.01 to 0.16) (n=9)    | 0.02 |
| Duration            | 0.00 (-0.03 to 0.03) (n=13)  | 1.00 | -0.02 (-0.12 to 0.07) (n=11) | 0.62 |
| IQ                  | 0.004 (-0.02 to 0.02) (n=5)  | 0.68 | 0.04 (-0.04 to 0.11) (n=5)   | 0.33 |
| CGI-S               | -0.95 (-1.76 to -0.14) (n=5) | 0.02 | *                            |      |

*Abbreviations:* CGI-S, global impression scale-severity; IQ, Intelligent quotient; \*no analysis for avoiding collinearity

**Appendix 1** to Liang S-C, Sun C-K, Fan H-Y. Therapeutic effects of antidepressants for global improvement and subdomain symptoms of autism spectrum disorders: a systematic review and meta-analysis. *J Psychiatry Neurosci* 2022. doi: 10.1503/jpn.210191. Copyright © 2022 The Author(s) or their employer(s). To receive this resource in an accessible format, please contact us at [cmajgroup@cmaj.ca](mailto:cmajgroup@cmaj.ca). Online appendices are unedited and posted as supplied by the authors.

**eTable 4. Summary of side effect profiles in different studies**

| Source                               | Medications                                         | DDD          | Age (yrs) | Serious AE                                          | Frequent side effects                                                |
|--------------------------------------|-----------------------------------------------------|--------------|-----------|-----------------------------------------------------|----------------------------------------------------------------------|
| Reddihough et al, <sup>41</sup> 2019 | Fluoxetine 4–30 mg/d                                | NA           | 7.5–18    | None                                                | Irritability (12%), insomnia (17.3%), nausea (13.3%)                 |
| Herscu et al, <sup>30</sup> 2020     | Fluoxetine 2–18 mg/d                                | 0.59         | 5–17      | Urticaria (n=1)<br>Suicidal ideation (n=1)          | Agitation (13%), insomnia (10%), activation (11%),                   |
| Carminati et al, <sup>40</sup> 2016  | Venlafaxine 18.75 mg/d                              | 0.185        | 18–45     | None                                                | Excessive stiffness and rigidity                                     |
| Hollander et al, <sup>39</sup> 2012  | Fluoxetine 20–80 mg/d                               | 3.24         | 18–60     | None                                                | Insomnia (13.6%), headache (13.6%), agitation (4.5%), fatigue (4.5%) |
| King et al, <sup>38</sup> 2009       | Citalopram 10–20 mg/d                               | 0.825        | 5–17      | Prolonged seizure (n=1)                             | Insomnia (38.4%), irritability (24.7%), fatigue (13.7%)              |
| Sugie et al, <sup>37</sup> 2005      | Fluvoxamine 1–3 mg/kg/d                             | NA           | 3–8.5     | None                                                | Transient nausea or hyperactivity                                    |
| Hollander et al, <sup>36</sup> 2005  | Fluoxetine 4.8–20 mg/d                              | 0.495        | 5–17      | None                                                | Fatigue (17.9%), agitation (46.2%), insomnia (35.9%)                 |
| Remington et al, <sup>35</sup> 2001  | Clomipramine 100–250 mg/d                           | 1.31         | 10–36     | None                                                | Fatigue (12.5%), tremor (6.2%), tachycardia (3.1%),                  |
| McDougle et al, <sup>34</sup> 1996   | Fluvoxamine 50–300 mg/d                             | 2.77         | 18–53     | None                                                | Nausea (9.7%), sedation (6.5%)                                       |
| Gordon et al, <sup>33</sup> 1993     | Clomipramine 25–250 mg/d                            | 1.52         | 6–23      | Severe tachycardia (n=1)<br>Grand mal seizure (n=1) | Sedation (23%), twitching (21%), constipation (25%), insomnia (29%)  |
| Gordon et al, <sup>31</sup> 1992     | Clomipramine 25–250 mg/d<br>Desipramine 25–250 mg/d | 1.29<br>1.11 | 6–18      | None                                                | Sleep disturbance, dry mouth, constipation                           |
| Chugani et al, <sup>32</sup> 2015    | Buspirone 5 mg/d<br>Buspirone 10 mg/d               | NA           | 2–6       | None                                                | Sleep disturbance (16.3%), fatigue (2.2%), irritability (12.0%)      |

**Appendix 1** to Liang S-C, Sun C-K, Fan H-Y. Therapeutic effects of antidepressants for global improvement and subdomain symptoms of autism spectrum disorders: a systematic review and meta-analysis. *J Psychiatry Neurosci* 2022. doi: 10.1503/jpn.210191. Copyright © 2022 The Author(s) or their employer(s). To receive this resource in an accessible format, please contact us at [cmajgroup@cmaj.ca](mailto:cmajgroup@cmaj.ca). Online appendices are unedited and posted as supplied by the authors.

|                                     |                         |    |      |                       |                                                                   |
|-------------------------------------|-------------------------|----|------|-----------------------|-------------------------------------------------------------------|
| Potter et al, <sup>29</sup> 2019    | Sertraline 2.5–5 mg/d   | NA | 2–6  | Viral infection (n=1) | Irritability (5.42%), sleep disturbance (8.43%), lethargy (1.81%) |
| Sanchez et al, <sup>42</sup> 1995   | NA                      | NA | NA   | NA                    | NA                                                                |
| Sikich et al, <sup>44</sup> 2014*   | Fluoxetine 2–20 mg/d    | NA | < 6  | None                  | Irritability (40%), insomnia (50%), rash (50%)                    |
| McDougle et al, <sup>43</sup> 2018* | Mirtazapine 7.5–45 mg/d | NA | 5–17 | None                  | Sedation (60%), appetite increase (50%), irritability (35%)       |

---

*Abbreviations:* \*Studies identified from [ClinicalTrials.gov](https://clinicaltrials.gov); AE, adverse events; d, day; DDD, defined daily dose; NA, not available or not applicable;

**Appendix 1** to Liang S-C, Sun C-K, Fan H-Y. Therapeutic effects of antidepressants for global improvement and subdomain symptoms of autism spectrum disorders: a systematic review and meta-analysis. *J Psychiatry Neurosci* 2022. doi: 10.1503/jpn.210191. Copyright © 2022 The Author(s) or their employer(s). To receive this resource in an accessible format, please contact us at [cmajgroup@cmaj.ca](mailto:cmajgroup@cmaj.ca). Online appendices are unedited and posted as supplied by the authors.

**Table 5. Specific data points for each of the measures extracted from original studies**

| Author <sup>Ref</sup> (year)           | Comparison               | N  | Outcome                                           | Duration<br>(weeks) | Study group      |                   | Control group    |                   |
|----------------------------------------|--------------------------|----|---------------------------------------------------|---------------------|------------------|-------------------|------------------|-------------------|
|                                        |                          |    |                                                   |                     | Pre-Tx mean (sd) | Post-Tx mean (sd) | Pre-Tx mean (sd) | Post-Tx mean (sd) |
|                                        |                          |    |                                                   |                     | Mean change (sd) | Mean change (sd)  | Mean change (sd) | Mean change (sd)  |
| SSRI vs. placebo                       |                          |    |                                                   |                     |                  |                   |                  |                   |
| Herscu et al. <sup>30</sup> (2020)     | Fluoxetine 2-18 mg/d     | 78 | 1. RRB: CYBOCS-PDD                                | 14                  | 15.6 (2.1)       | 13.5 (3.3)        | 15 (2.2)         | 12.4 (3.6)        |
|                                        | Placebo                  | 80 |                                                   |                     |                  |                   |                  |                   |
| Reddihough et al. <sup>41</sup> (2019) | Fluoxetine 4-30 mg/d     | 75 | 1. RRB: CYBOCS-PDD                                | 16                  | 12.8 (3.41)      | 9.02 (4.84)       | 13.13 (3.36)     | 10.89 (4.92)      |
|                                        |                          |    | 2. Global: CGI-I                                  |                     | 3.22 (1.12)      | 3.38 (1.1)        |                  |                   |
|                                        |                          |    | 3. Irritability: ABC irritability                 |                     | 18.57 (10)       | 12.28 (9.19)      | 17.87 (11.8)     | 13.34 (11.29)     |
|                                        | Placebo                  | 71 | 4. Hyperactivity: ABC hyperactivity               | 21.71 (11.11)       | 16.21 (10.48)    | 21.28 (11.51)     | 17.6 (12.52)     |                   |
|                                        |                          |    | 5. Social withdrawal: ABC social withdrawal       | 12.57 (8.03)        | 9.49 (6.77)      | 16.8 (10.6)       | 13.85 (9.32)     |                   |
|                                        |                          |    | 6. Inappropriate speech: ABC inappropriate speech | 4.48 (3.65)         | 3.6 (3.18)       | 4.8 (3.37)        | 4.04 (3.44)      |                   |
|                                        |                          |    | 7. Anxiety: Spence children anxiety               | 31.24 (21.72)       | 20.58 (18.17)    | 32.17 (20.15)     | 24.7 (17.11)     |                   |
| Hollander et al. <sup>36</sup> (2012)  | Fluoxetine 20-80 mg/d    | 22 | 1. RRB: Y-BOCS                                    | 12                  | 12.48 (2.71)     | 10.48 (3.92)      | 11.92 (2.02)     | 11.15 (3.05)      |
|                                        | Placebo                  | 15 | 2. Global: CGI-I                                  |                     | 3.05 (0.93)      | 3.68 (0.45)       |                  |                   |
| Hollander et al. <sup>39</sup> (2005)  | Fluoxetine 4.8–20 mg/day | 19 | 1. RRB: CY-BOCS                                   | 8                   | 12.84 (2.6)      | 11.63 (3.8)       | 13.45 (2.9)      | 12.95 (3.2)       |
|                                        | Placebo                  | 20 | 2. Global: CGI-I                                  |                     | 3.42 (1.2)       | 3.06 (1.1)        |                  |                   |

**Appendix 1** to Liang S-C, Sun C-K, Fan H-Y. Therapeutic effects of antidepressants for global improvement and subdomain symptoms of autism spectrum disorders: a systematic review and meta-analysis. J Psychiatry Neurosci 2022. doi: 10.1503/jpn.210191. Copyright © 2022 The Author(s) or their employer(s). To receive this resource in an accessible format, please contact us at [cmajgroup@cmaj.ca](mailto:cmajgroup@cmaj.ca). Online appendices are unedited and posted as supplied by the authors.

|                                      |                                  |            |                                                   |    |                                                               |                                      |                |               |
|--------------------------------------|----------------------------------|------------|---------------------------------------------------|----|---------------------------------------------------------------|--------------------------------------|----------------|---------------|
| Sikich et al. <sup>44</sup> (2014)*  | Fluoxetine 2-20 mg/d             | 8          | 1. Irritability: ABC irritability                 | 48 | -8.5 (change from baseline; sd: 10.6)                         | -0.7 (change from baseline; sd: 2.9) |                |               |
|                                      | Placebo                          | 10         |                                                   |    |                                                               |                                      |                |               |
| Sugie et al. <sup>37</sup> (2005)    | fluvoxamine 1-3 mg/kg/day        | 18         | 1. Irritability: BAS emotional instability        | 12 | 0.5208 (mean difference between drug and placebo); $p < 0.05$ |                                      |                |               |
|                                      |                                  |            | 2. Hyperactivity: BAS hyperactivity               |    | 0.4575 (mean difference between drug and placebo); $p > 0.05$ |                                      |                |               |
|                                      | Placebo                          | 18         | 3. Social withdrawal: BAS social withdrawal       |    | 0.6819 (mean difference between drug and placebo); $p > 0.05$ |                                      |                |               |
|                                      |                                  |            | 4. Inappropriate speech: BAS inappropriate speech |    | 0.0400 (mean difference between drug and placebo); $p < 0.05$ |                                      |                |               |
| McDougle et al. <sup>34</sup> (1996) | Fluvoxamine 50-300 mg/d          | 15         | 1. RRB: Y-BOCS                                    | 12 | 21.4 (7.3)                                                    | 13.7 (9.1)                           | 21.5 (6.8)     | 21.9 (6.7)    |
|                                      | Placebo                          | 15         | 2. Global: CGI-I                                  |    | 2.6 (0.3)                                                     | 4.33 (0.18)                          |                |               |
|                                      |                                  |            | 3. Irritability: Brown Aggression Scale           |    | F=6.40; $p < 0.02$                                            | (Between groups)                     |                |               |
| Potter et al. <sup>29</sup> (2019)   | Sertraline 2.5-5 mg/d            | 32         | 1. RRB: VAS A/OCB                                 | 24 | 4.87 (2.58)                                                   | 6.48 (2.61)                          | 4.98 (2.3)     | 6.86 (2.37)   |
|                                      |                                  |            | 2. Global: CGI-I                                  |    | 1.23 (1.11)                                                   | 1.14 (0.96)                          |                |               |
|                                      | 3. Inappropriate speech: VAS L/C | 2.03 (1.7) | 4.7 (2.73)                                        |    | 2.84 (2.04)                                                   | 5.53 (2.95)                          |                |               |
|                                      | Placebo                          | 26         | 4. Social withdrawal: SRS                         |    | 99.63 (27.45)                                                 | 94.42 (29.71)                        | 101.63 (28.41) | 94.19 (30.12) |
|                                      |                                  |            | 5. Anxiety: PARS-R                                |    | 14.75 (11.58)                                                 | 14.77 (14.45)                        | 15.38 (12.51)  | 11.43 (10.04) |
| King et al. <sup>38</sup> (2009)     | Citalopram 10-20 mg/d            | 73         | 1. RRB: CYBOCS-PDD                                | 12 | 15.1 (1.8)                                                    | 13.1 (3.7)                           | 15 (2.1)       | 13.1(3.2)     |
|                                      |                                  |            | 2. Irritability: ABC irritability                 |    | 13.2 (8.8)                                                    | 10.1 (9.3)                           | 11.2 (8.5)     | 10.2 (8.9)    |
|                                      |                                  |            | 3. Hyperactivity: ABC hyperactivity               |    | 20.2 (11.7)                                                   | 18.5 (12.9)                          | 20.2 (11.2)    | 17.4 (11.5)   |
|                                      | Placebo                          | 76         | 4. Social withdrawal: ABC social withdrawal       |    | 11.4 (8.2)                                                    | 8.1 (8.1)                            | 11.1(8)        | 8.2 (7.5)     |
|                                      |                                  |            | 5. Inappropriate speech: ABC inappropriate speech |    | 5.3 (3.7)                                                     | 4.4 (3.7)                            | 5 (3.7)        | 4.2 (3.3)     |

**Appendix 1** to Liang S-C, Sun C-K, Fan H-Y. Therapeutic effects of antidepressants for global improvement and subdomain symptoms of autism spectrum disorders: a systematic review and meta-analysis. J Psychiatry Neurosci 2022. doi: 10.1503/jpn.210191. Copyright © 2022 The Author(s) or their employer(s). To receive this resource in an accessible format, please contact us at [cmajgroup@cmaj.ca](mailto:cmajgroup@cmaj.ca). Online appendices are unedited and posted as supplied by the authors.

| SNRI vs. placebo                      |                           |    |                                                   |    |                                   |                                   |             |                 |
|---------------------------------------|---------------------------|----|---------------------------------------------------|----|-----------------------------------|-----------------------------------|-------------|-----------------|
| Carminati et al. <sup>40</sup> (2016) | Venlafaxine 18.75 mg/d    | 6  | 1. RRB: ABC stereotype                            | 8  | +0.5 (Change in Median); $p=0.75$ | 0 (Change in Median); $p=0.69$    |             |                 |
|                                       |                           |    | 2. Global: CGI-I                                  |    | 3 (Median); 2 to 5 (range)        | 2 (Median); 1 to 6 (range)        |             |                 |
|                                       |                           |    | 3. Irritability: ABC irritability                 |    | -1 (Change in Median); $p=0.63$   | -10 (Change in Median); $p=0.078$ |             |                 |
|                                       | Placebo                   | 7  | 4. Hyperactivity: ABC hyperactivity               |    | -1.5 (Change in Median), $p=0.75$ | -3 (Change in Median); $p=0.30$   |             |                 |
|                                       |                           |    | 5. Social withdrawal: ABC social withdrawal       |    | +1.5 (Change in Median); $p=0.81$ | -6 (Change in Median); $p=0.031$  |             |                 |
|                                       |                           |    | 6. Inappropriate speech: ABC inappropriate speech |    | 0 (Change in Median); $p=0.75$    | 0 (Change in Median) ; $p=1$      |             |                 |
| TCA vs. placebo                       |                           |    |                                                   |    |                                   |                                   |             |                 |
| Remington et al. <sup>35</sup> (2001) | Clomipramine 100-150 mg/d | 36 | 1. RRB: ABC: repetitive behaviors                 | 7  | 9.24                              | 5.94; $p>0.05$                    | 9.24        | 6.77; $p>0.05$  |
|                                       |                           |    | 2. Global: CARS                                   |    | 41.8 (7.1)                        | 37.8 (8.7)                        | 41.8 (7.1)  | 39.4 (7.0)      |
|                                       |                           |    | 3. Irritability: ABC irritability                 |    | 19.18                             | 15.99; $p>0.05$                   | 19.18       | 17.5; $p>0.05$  |
|                                       | Placebo                   | 36 | 4. Hyperactivity: ABC hyperactivity               |    | 25.9                              | 23.33; $p>0.05$                   | 25.9        | 25.03; $p>0.05$ |
|                                       |                           |    | 5. Social withdrawal: ABC social withdrawal       |    | 11.74                             | 10.97; $p>0.05$                   | 11.74       | 9.24; $p>0.05$  |
|                                       |                           |    | 6. Inappropriate speech: ABC inappropriate speech |    | 3.4                               | 2.78; $p>0.05$                    | 3.4         | 4.24; $p>0.05$  |
| Gordon et al. <sup>33</sup> (1993)    | Clomipramine 25-250 mg/d  | 12 | 1. RRB: Modified CPRS OCD subscale                | 10 | 12.2 (3.31)                       | 8.58 (4.75)                       | 12.2 (3.31) | 12.1 (3.33)     |
|                                       | Placebo                   | 12 | 2. Global: CPRS – autism relevant subscale        |    | 47.3 (8.4)                        | 37.6 (7.9)                        | 47.3 (8.4)  | 46.3 (8.2)      |
| Gordon et al. <sup>31</sup> (1992)    | Clomipramine 25-250mg/d   | 7  | 1. RRB: NIMH-GOCS                                 | 5  | 19 (11)                           | 7 (11)                            | 19 (11)     | 20 (12)         |

**Appendix 1** to Liang S-C, Sun C-K, Fan H-Y. Therapeutic effects of antidepressants for global improvement and subdomain symptoms of autism spectrum disorders: a systematic review and meta-analysis. J Psychiatry Neurosci 2022. doi: 10.1503/jpn.210191. Copyright © 2022 The Author(s) or their employer(s). To receive this resource in an accessible format, please contact us at [cmajgroup@cmaj.ca](mailto:cmajgroup@cmaj.ca). Online appendices are unedited and posted as supplied by the authors.

|                                           |                               |     |                                                                                    |     |                                       |               |                                       |              |
|-------------------------------------------|-------------------------------|-----|------------------------------------------------------------------------------------|-----|---------------------------------------|---------------|---------------------------------------|--------------|
| (Clomipramine)                            | Placebo                       | 4   | 2. Global: Children's Psychiatric Rating Scale Score                               |     | 42 (4)                                | 24 (7)        | 42 (4)                                | 46 (4)       |
| Gordon et al. <sup>31</sup> (1992)        | Desipramine 25-250 mg/d       | 7   | 1. RRB: NIMH-GOCS                                                                  |     | 19 (11)                               | 18 (9)        | 19 (11)                               | 20 (12)      |
| (Desipramine)                             | Placebo                       | 3   | 2. Global: Children's Psychiatric Rating Scale Score                               | 5   | 42 (4)                                | 41 (8)        | 42 (4)                                | 46 (4)       |
| <b>Other antidepressants</b>              |                               |     |                                                                                    |     |                                       |               |                                       |              |
|                                           | Buspirone                     |     | 1. RRB: CY-BOCS                                                                    |     | 11.80 (0.67)                          | 10.90 (0.63)  | 11.9 (0.6)                            | 11.2 (0.6)   |
|                                           | (5 mg/d+10mg/d)               | 109 | 2. Global: ADOS-CTS                                                                |     | 18.35 (0.65)                          | 17.06 (1.1)   | 19.6 (0.6)                            | 18.6 (0.7)   |
| Chugani et al. <sup>32</sup> (2016)       |                               |     | 3. Social withdrawal: ABC social withdrawal,                                       | 24  | 13.53 (2.13)                          | 11.34 (1.3)   | 14.2 (1.2)                            | 11 (1.1)     |
|                                           | Placebo                       | 57  | 4. Inappropriate speech: ABC inappropriate speech                                  |     | 4.05 (0.61)                           | 3.80 (0.54)   | 3.8 (0.5)                             | 3.9 (0.5)    |
|                                           |                               |     | 5. Anxiety: Anxiety composite score( ABC irritability + Leiter emotion regulation) |     | 0.26 (0.29)                           | -0.002 (0.16) | 0.008 (0.1)                           | -0.242 (0.1) |
| McDougle et al. <sup>43</sup> (2018)*     | Mirtazapine 7.5-45 mg/d       | 20  | 1. Anxiety: PARS                                                                   | 10  | -4.9 (Change from baseline); sd: 5.47 |               | -3.2 (Change from baseline); sd: 5.31 |              |
|                                           | Placebo                       | 10  |                                                                                    |     |                                       |               |                                       |              |
| <b>Antidepressants vs. antipsychotics</b> |                               |     |                                                                                    |     |                                       |               |                                       |              |
| Sanchez et al. <sup>42</sup> (1995)       | Clomipramine 2.8-4.4 mg/kg/d  | 8   | 1. CGI-S                                                                           | 4.5 | F=27.74; p=0.01 (diff. btw. groups)   |               |                                       |              |
|                                           | Haloperidol 0.02-0.05 mg/kg/d | 8   | 2. CPRS: hyperactivity, speech deviance                                            |     | 4                                     | 3.75; p>0.05  | 3.82                                  | 3.38; p>0.05 |

*Abbreviations:* \*Studies identified from ClinicalTrials.gov; ABC, aberrant behavior checklist; ADOS-CTS, autism diagnostic observation schedule – composite total score; A/H/H, aggression/hyperarousal/hyperactivity; A/OCB, anxiety/obsessive compulsive behavior; BAS, behavioral assessment scale; btw. between; CARS, childhood autism rating scale; CGI-I, clinical global impression – improvement; CGI-S, clinical global impression – severity; CPRS, comprehensive psychopathological rating scale; CY-BOCS, children's Yale-Brown obsessive compulsive

**Appendix 1** to Liang S-C, Sun C-K, Fan H-Y. Therapeutic effects of antidepressants for global improvement and subdomain symptoms of autism spectrum disorders: a systematic review and meta-analysis. *J Psychiatry Neurosci* 2022. doi: 10.1503/jpn.210191. Copyright © 2022 The Author(s) or their employer(s). To receive this resource in an accessible format, please contact us at [cmajgroup@cmaj.ca](mailto:cmajgroup@cmaj.ca). Online appendices are unedited and posted as supplied by the authors.

scale; CYBOCS-PDD, children's Yale-Brown obsessive compulsive scale – modified for pervasive developmental disorders; diff. difference; L/C language/communication; N, number of participants; NIMH-GOCS, national institute of mental health global obsessive compulsive scale; OCD, obsessive-compulsive disorder; PARS, pediatric anxiety rating scale; PARS-R, pediatric anxiety rating scale - revised; sd, standard deviation; SNRI, Serotonin and norepinephrine reuptake inhibitors; SRS, social responsiveness scale; SSRI, Selective serotonin reuptake inhibitors; TCA, Tricyclic Antidepressants; Tx, treatment; VAS, visual analog scale; Y-BOCS, Yale-Brown obsessive compulsive scales.



**Appendix 1** to Liang S-C, Sun C-K, Fan H-Y. Therapeutic effects of antidepressants for global improvement and subdomain symptoms of autism spectrum disorders: a systematic review and meta-analysis. *J Psychiatry Neurosci* 2022. doi: 10.1503/jpn.210191. Copyright © 2022 The Author(s) or their employer(s). To receive this resource in an accessible format, please contact us at [cmajgroup@cmaj.ca](mailto:cmajgroup@cmaj.ca). Online appendices are unedited and posted as supplied by the authors.

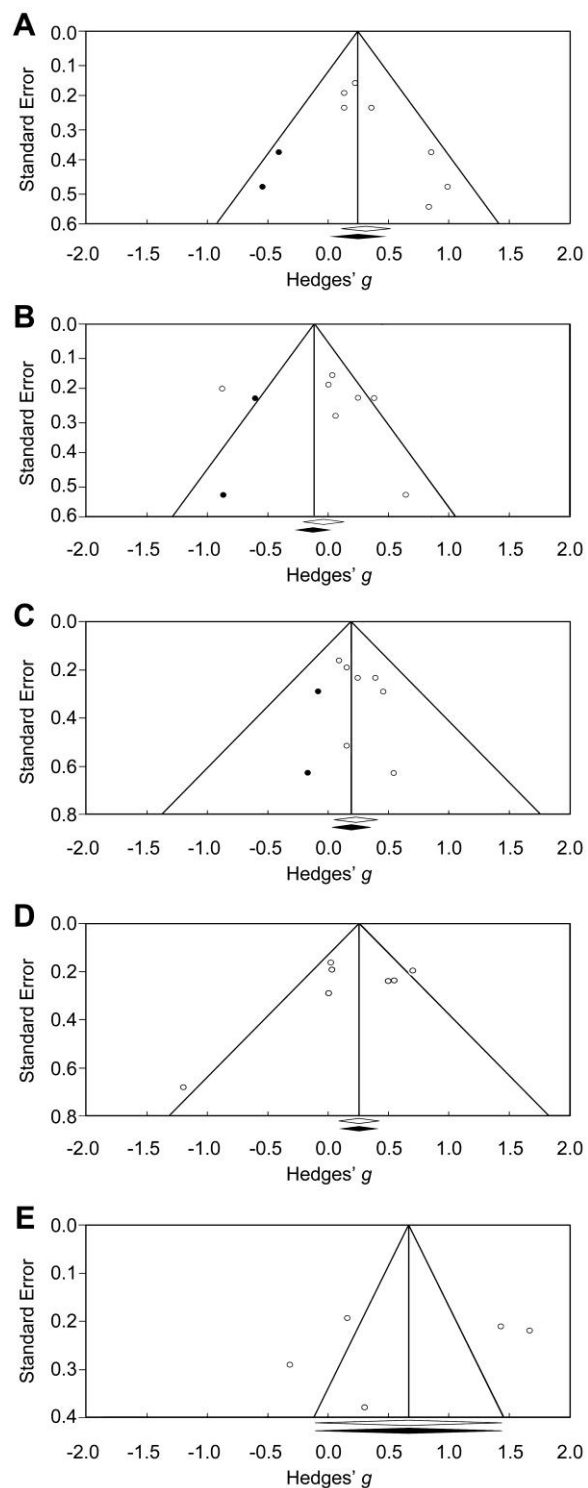

**eFigure 1.** Random-effects funnel plot detailing publication bias in the studies reporting (A) irritability, (B) social withdrawal, (C) hyperactivity, (D) inappropriate speech, and (E) anxiety between antidepressant group and its comparators.
